1 **ARTICLE**

2

3 **Mitochondrial genetic effects on reproductive success: signatures**  
4 **of positive intra-sexual, but negative inter-sexual pleiotropy**

5

6

7 **Running Title:** mtDNA effects on reproductive success

8

9 **Keywords:** mitochondria, life-history, sexual conflict, reproduction, maternal  
10 inheritance, sexual antagonism

11

12

13 M. Florencia Camus<sup>1,2</sup>, Damian K. Dowling<sup>1</sup>

14 <sup>1</sup> School of Biological Sciences, Monash University, 3800, Australia

15 <sup>2</sup> Research Department of Genetics, Evolution and Environment, University College

16 London, Gower Street, London, WC1E 6BT, United Kingdom

17

18 f.camus@ucl.ac.uk, damian.dowling@monash.edu

19

20

## 21 **Abstract**

22 Mitochondria contain their own DNA, and numerous studies have reported that genetic  
23 variation in this (mt)DNA sequence modifies the expression of life-history phenotypes.  
24 Maternal inheritance of mitochondria adds a layer of complexity to trajectories of mtDNA  
25 evolution, because theory predicts the accumulation of mtDNA mutations that are male-biased  
26 in effect. While it is clear that mitochondrial genomes routinely harbor genetic variation that  
27 affects components of reproductive performance, the extent to which this variation is sex-  
28 biased, or even sex-specific in effect, remains elusive. This is because nearly all previous  
29 studies have failed to examine mitochondrial genetic effects on both male and female  
30 reproductive performance within the one-and-the-same study. Here, we show that variation  
31 across naturally-occurring mitochondrial haplotypes affects components of reproductive  
32 success in both sexes, in *Drosophila melanogaster*. However, while we uncovered evidence  
33 for positive pleiotropy, across haplotypes, in effects on separate components of reproductive  
34 success when measured within the same sex, such patterns were not evident across sexes.  
35 Rather, we found a pattern of sexual antagonism across haplotypes on some reproductive  
36 parameters. This suggests the pool of polymorphisms that delineate global mtDNA haplotypes  
37 is likely to have been partly shaped by maternal transmission of mtDNA and its evolutionary  
38 consequences.

39

40

41

42

## 43 **Introduction**

44 Eukaryotic cells are thought to have arisen from the ancient symbiotic union between two  
45 prokaryote cells; one an  $\alpha$ -proteobacterium and the other an archaean-like organism. The  $\alpha$ -  
46 proteobacterium would evolve into the mitochondrion, and the archaea-like bacterium into the  
47 eukaryote cell (1). Moreover, each of these ancestral entities possessed their own genomes, and  
48 their symbiosis kick-started millions of years of inter-genomic coevolution that delineates  
49 contemporary eukaryotes from the organisms of other domains (2). Almost without exception,  
50 eukaryotes from fungi to animals have retained these two genomes – one mitochondrial  
51 (comprised of mtDNA), the other nuclear, and interactions between genes spanning each of  
52 these genomes coordinate closely to regulate critical biological processes tied to cellular  
53 metabolism via oxidative phosphorylation (OXPHOS) (3-5).

54 Over the course of evolutionary history, most of the genes in the mitochondrial genome have  
55 translocated to the host nuclear genome, leaving only a small number of genes in the mtDNA,  
56 including thirteen protein-coding genes that are salient to OXPHOS function (4). Evolutionary  
57 biologists long assumed that purifying selection would prevent any non-neutral (i.e.,  
58 phenotype-modifying) genetic variation from accumulating within these mtDNA-encoded  
59 genes, given these genes encode essential subunits of the electron transport chain, and given  
60 that the mitochondrial genome is haploid and therefore all alleles within it are invariably  
61 exposed to natural selection (6-8). As such, the mitochondrial genome was harnessed as the  
62 quintessential molecular marker upon which to base evolutionary and population genetic  
63 inferences, facilitated by its high mutation rate, maternal inheritance and general lack of  
64 recombination (6, 9-12).

65 Over the past two decades, however, an increasing number of studies has challenged this  
66 assumption of neutrality (7, 13, 14). In particular, numerous studies have used

67 multigenerational breeding schemes with the power to partition mitochondrial genetic from  
68 nuclear genetic effects, and revealed that the genetic polymorphisms that delineate distinct  
69 mitochondrial haplotypes, sourced from separate populations, contribute to the expression of  
70 life-history traits tied to reproductive success, development, and longevity (3, 15-23).

71 Currently, however, it is unclear how these phenotype-modifying genetic polymorphisms  
72 accumulate within mitochondrial genomes. One alternative is that they constitute adaptations,  
73 fixed under natural selection. This is consistent with the results of some studies that examined  
74 mutational profiles of mtDNA sequences, and found signatures of positive selection in the form  
75 of elevated ratios of non-synonymous ( $dN$  – changes amino acid) to synonymous ( $dS$  – does  
76 not change amino acid) mutations (24-26). Alternatively, such polymorphisms might rise to  
77 appreciable frequencies within populations under mutation-selection balance, and potentially  
78 then be fixed by drift. This alternative is plausible; firstly, given the mitochondrial genome has  
79 a high mutation rate relative to its nuclear counterpart (27). Secondly, it is reasonable to predict  
80 there will be a diminished efficiency of selection in shaping the mtDNA sequence relative to  
81 nuclear DNA sequences, because of a theorised fourfold reduction in the effective population  
82 size of the mitochondrial genome that stems from it being haploid and maternally inherited (6,  
83 7).

84

85 Maternal inheritance of mitochondrial genomes adds a further layer of complexity to the  
86 dynamics of mtDNA sequence evolution, because it means that selection can only act on non-  
87 neutral mtDNA polymorphisms directly through the female lineage (28-30). This hypothesis,  
88 which has been called “Mothers Curse” (29), predicts that mutations that are neutral, beneficial  
89 or even slightly deleterious to females may accumulate in the mtDNA sequence even if these  
90 very same mutations are harmful in their effects on males (30). Recent studies in *Drosophila*  
91 uncovered evidence for the existence of a pool of male-harming, but female-neutral

92 polymorphisms that have accrued within mtDNA haplotypes, and which affects genome-wide  
93 patterns of gene expression in males, particularly of genes involved in encoding male-specific  
94 reproductive tissues (31), and that shapes patterns of male, but not female, longevity (21, 32).  
95  
96 However, the extent to which mitochondrial haplotypes exhibit sex-biases in their effects on  
97 the expression of life history phenotypes remains unclear, because relative few studies have  
98 measured phenotypic effects associated across sets of naturally-occurring mtDNA genotypes  
99 in both males and females, respectively (18, 21-23, 31-35). The sparsity of studies reporting  
100 sex-specificity in effects is particularly evident when it comes to traits tied to reproductive  
101 performance. Indeed, we are aware of only a single study to date that sought to measure  
102 mtDNA-mediated effects on components of reproductive success in both males and females.  
103 Immonen et al. (2016) examined the expression of components tied to reproductive success in  
104 each of the sexes across orthogonal combinations of mitochondrial and nuclear genotype  
105 sourced from three distinct populations, in the seed beetle, *Callosobruchus maculatus*. The  
106 nuclear genomic backgrounds, against which the three different mtDNA haplotypes were  
107 placed, were not isogenic, but rather represented by large pools of segregating nuclear allelic  
108 variance that were sourced from each of three global populations. The authors reported  
109 mitochondrial genetic, and mito-nuclear interactions for female fecundity, and male ejaculate  
110 weight, and also an effect on female egg size that was traceable to an interaction involving the  
111 age and mito-nuclear genotype of the sire. Correlations in the reported mitochondrial, or mito-  
112 nuclear, genetic effects across the measured traits were, however, not examined (22)

113 Broadly, the general failure of previous studies to have examined mitochondrial genetic  
114 contributions to reproductive phenotypes in both sexes has led to a gap in our understanding of  
115 the genetic architecture of mitochondrial genomes, particularly in light of the prediction that  
116 traits and tissue types exhibiting strong sexual dimorphism and sex-limitation in expression

117 (such as the testes, sperm and reproductive glands involved in male reproductive outcomes)  
118 are hypothesized to be the key candidates for susceptibility to Mother's Curse effects (28, 30,  
119 31, 36). Furthermore, very few studies have measured multiple traits across the same set of  
120 mtDNA genotypes, to examine levels and patterns of mtDNA-linked pleiotropy across traits,  
121 within and across the sexes. Studies that have screened for such pleiotropy have, however,  
122 reported interesting patterns, providing insights into the evolutionary processes by which  
123 genetic variation can accumulate within mitochondrial genomes. For example, Dowling et al.  
124 (2009) found a strong positive association in effects of two mtDNA haplotypes segregating  
125 within a population of *D. melanogaster*, on two life history traits in females - reproductive  
126 performance and longevity (37). The haplotype conferring higher female reproductive success  
127 also conferred higher female lifespan. In another study, Camus et al (2015) reported that a SNP  
128 found within the mtDNA-encoded *CYTB* gene of *D. melanogaster*, which is associated with  
129 low fertility in males (38) but not in females, confers higher male lifespan but shorter female  
130 lifespan relative to haplotypes harbouring other variants of this gene (21). This SNP is therefore  
131 associated with antagonistic pleiotropic effects both within and across the sexes, consistent  
132 with the idea that some mtDNA SNPs might accumulate under positive selection in females,  
133 even if they are associated with suboptimal male phenotypes (30). If so, then maternal  
134 inheritance of mitochondria could potentially lead to sexually antagonistic trajectories of  
135 mtDNA evolution (39-41).

136 To address patterns of sex-specificity and pleiotropy of mitochondrial genetic variation, here  
137 we screen thirteen naturally-occurring mitochondrial haplotypes of *D. melanogaster*, each  
138 sourced from a distinct global population, for components of reproductive output in each sex.  
139 We used strains in which each of these haplotypes had been placed alongside an isogenic  
140 nuclear background prior to the phenotypic assays (32, 42, 43), such that all phenotypic effects  
141 observed could be traced directly to genetic polymorphisms separating each haplotype. Firstly,

142 we measured reproductive success of males and females who had abstained from sexual  
143 interactions until the peak of their fertility, and were then provided with a 24 h opportunity to  
144 mate and reproduce (hereafter termed “short-burst” components of reproduction). Secondly,  
145 we measured reproductive success of each sex over a prolonged period of time, from eclosion  
146 into adulthood to 8 (male) and 12 (female) days of age (termed “sustained” reproductive  
147 success). Thus, we performed two assays of reproductive success for each sex – one  
148 representing success based on a limited opportunity at the peak of an individual’s reproductive  
149 lifespan; the other based on reproductive stamina when faced with multiple opportunities and  
150 partners across the early phase of adult life.

151

## 152 **Materials and Methods**

### 153 **Mitochondrial lines**

154 Thirteen *Drosophila melanogaster* strains were used, and these strains have been previously  
155 described (38, 43). In brief, the isogenic nuclear background from the  $w^{1118}$  strain  
156 (Bloomington stock number: 5905) was coupled to mitochondrial haplotypes from thirteen  
157 distinct geographic locations using a crossing scheme that is outlined in Clancy (2008). These  
158 strains have each been maintained in duplicate since 2007, with the duplicates propagated  
159 independently, to enable us to partition mitochondrial genetic effects from cryptic nuclear  
160 variance that might have accumulated among the strains, as well as from other sources of  
161 environmental variation. Each generation, virgin females are collected from each duplicate of  
162 each mitochondrial strain (hereafter *mitochondrial strain duplicate*) and backcrossed to males  
163 of the  $w^{1118}$  strain, to maintain isogenicity of the nuclear background. Furthermore,  $w^{1118}$  is  
164 itself propagated by one pair of full-siblings per generation. Thus, if mutations arise in the  $w^{1118}$

165 strain, they will be swiftly fixed and passed to all mitochondrial strain duplicates, thus  
166 maintaining the critical requirement of isogenicity of the nuclear genome.

167

168 One of the mitochondrial strains (Brownsville) incurs complete male sterility in the  $w^{1118}$   
169 nuclear background, whereas females who harbour this haplotype remain fertile (38). This  
170 strain was therefore excluded from assays of male reproductive success (n=12 haplotypes in  
171 these assays), but included in assays of female reproductive success (n=13 haplotypes). All  
172 mitochondrial strains and  $w^{1118}$  flies were reared at 25°C, under a 12h: 12h light: dark  
173 photoperiod regime, on potato-dextrose-agar food medium and with *ad libitum* access to live  
174 yeast. All strains had been cleared of any potential endosymbionts, such as *Wolbachia*, through  
175 tetracycline treatment at the time that the strains were created (44). Diagnostic PCR with  
176 *Wolbachia*-specific primers confirmed all lines are free of *Wolbachia* (45).

177

### 178 **Male Reproductive Success**

179 Two separate components of male reproductive success were measured, via two separate  
180 experiments. The first experiment measured male short-burst offspring production, i.e.  
181 following an exposure to a single female at the peak age of male reproductive fertility. This  
182 assay measures the ability of a male to convince a virgin female to mate, and then measures  
183 the number of offspring produced from sexual interaction with that female, which is likely to  
184 be a function of the males ejaculate quality (number and quality of sperm, and content and  
185 quality of reproductive proteins, transferred). The second experiment gauged sustained  
186 offspring production across the first eight days of adult life, during which time males had  
187 ongoing access to new and virgin females. This assay thus represents a measure of male  
188 reproductive stamina (a function of male mating rate across time, and ability to replenish sperm  
189 and ejaculate stores). Each assay is described below.



190 Male reproductive success following exposure to a single female (short-burst offspring  
191 production)

192 This experiment measured offspring produced by a single male after a one-off mating  
193 opportunity with a virgin female when 4 days of adult age. The assay was run in two blocks,  
194 each separated in time by one generation. For three generations leading up to the experiment,  
195 each mitochondrial strain duplicate was propagated across 3 vials, with each vial containing 10  
196 pairs of flies of standardised age (4 day old), and at controlled larval densities (approximately  
197 80 eggs per vial). Then, ten virgin males from each mitochondrial strain duplicate (total 20  
198 male flies per haplotype) were collected randomly from the 3 vials that propagate the line, and  
199 each stored individually in separate 40 ml vials containing 5mL of food medium. At the same  
200 time, virgin females were collected from the isogenic  $w^{1118}$  strain to be used as “tester” flies in  
201 the experiment. These females were sourced from 10 separate vials, which had been propagated  
202 and stored under the same experimental conditions as described for the mitochondrial strain  
203 focal males, and they were stored in groups of 10 females per vial.

204 When four days old, each focal male was then combined with an equivalently-aged “tester”  
205 female, and these flies then cohabited the same vial for a 24 h period. Following this, focal  
206 males were removed from the mating vial and discarded. Females were then transferred into  
207 fresh vials with food substrate every 24 h over a 4 d period. The total number of offspring  
208 eclosing across these four vials was recorded for each focal male.

209 Male reproductive across 8 days (sustained offspring production)

210 Sustained offspring production was assayed following the method described in Yee et al.  
211 (2015). In brief, individual males collected from each mitochondrial strain duplicate were  
212 provided with the opportunity to mate with eight different virgin females over eight consecutive  
213 24 h long exposures (46). To initiate the assay, twenty virgin males were collected from each

214 mitochondrial strain duplicate, and each placed in a separate vial (total of 40 flies per  
215 mitochondrial haplotype). Twenty-four hours later, one 4-day-old virgin  $w^{1118}$  female was  
216 added to each vial, and the focal male and tester female then cohabited for 24 h. Following this  
217 24 h exposure, males were removed and placed with another 4-day-old virgin  $w^{1118}$  female for  
218 another 24 h period. This process was repeated until day eight of the experiment (8 separate  
219 exposures). After each exposure, the  $w^{1118}$  females were retained and themselves transferred  
220 into fresh vials every 24 h for a total period of 4 consecutive days (including the 24 h  
221 cohabitation period), thus providing each female with up to 96 h to oviposit. Thirteen days  
222 following the 96h oviposition period, the number of eclosed adult offspring emerging from  
223 each vial was counted.

#### 224 **Female reproductive success**

225 Two separate components of female reproductive success were measured. The first experiment  
226 gauged “short-burst” components of success, in which the number of eggs produced per female  
227 (fecundity), number of adults (reproductive success) produced, and proportion of eggs that  
228 ultimately eclosed into adulthood (an index of short-burst viability) were scored, following a  
229 24 h laying opportunity at the peak age of female fecundity (4 days of age). The second  
230 experiment measured sustained performance, in which female reproductive success was  
231 calculated over a 13-day period, thus representing a measure of reproductive stamina.

#### 232 Female components of short-burst offspring production, and short-burst ‘egg-to-adult’ 233 viability

234 The assay was run in five blocks, each separated in time by one generation. Female focal flies  
235 from each mitochondrial strain duplicate were collected as virgins, and stored individually.  
236 These were collected over numerous 40mL vials, each of which had been propagated by 10  
237 pairs of age-controlled parents (4 day old), and at controlled larval densities (approximately 80

238 eggs per vial). When 4 days of age, each female was exposed to one 4 d old tester virgin male,  
239 collected from the  $w^{1118}$  strain, for a period of 12 hours and then the females transferred to a  
240 fresh vial for 24 h to oviposit. Following this 24 hour ovipositioning period, females were  
241 discarded. We counted the eggs oviposited per female over this 24 h period (an index of short-  
242 burst fecundity), plus the offspring that emerged from these eggs (an index of short-burst  
243 offspring production).

244 Furthermore, we were able to calculate the proportion of eggs laid by each female that were  
245 converted into adult offspring (short-burst viability). Although many studies treat egg-adult  
246 viability as a measure of offspring viability, this trait stands at the nexus between a maternal  
247 and an offspring trait (47), and it is well established that maternal effects affect the trait in *D.*  
248 *melanogaster* (48-50). Indeed, strong maternal effects on this trait are in direct alignment with  
249 predictions of classic life-history theory, in which maternal resource provisioning into the ova  
250 lies at the heart of the classic evolutionary trade-off between gamete size and number (51); a  
251 trade-off that extends to *Drosophila* (52, 53). While ultimately it is not possible for us to  
252 delineate whether any mitochondrial haplotype effects on short-burst viability are manifested  
253 primarily through mothers (as mtDNA-mediated maternal effects) or primarily on the offspring  
254 themselves (via the direct effects of mtDNA mutations on survival through juvenile  
255 development), it is nonetheless highly informative to examine patterns of mitochondrial  
256 haplotypic variation affecting this trait among the other dedicated components of female and  
257 male reproductive success, and thus we include it in our study.

#### 258 *Female offspring production across 13 days (sustained offspring production)*

259 Forty females from each mitochondrial strain duplicate were collected as virgins, and placed  
260 in individual vials. One day later, two 4 d old virgin  $w^{1118}$  males were placed into each female  
261 vial. Females, and the two males with which each female cohabited, were then transferred

262 into fresh vials every 24 hours, for 13 days. The accompanying males were discarded every  
263 fourth day, and two 4 d old virgin males of the  $w^{1118}$  strain were added. This ensured that  
264 females were not sperm-limited throughout the duration of the experiment. At the end of day  
265 13, all flies across all vial were discarded, and vials were kept for eggs to develop. Female  
266 reproductive success was determined by counting the total number of adult offspring  
267 produced by each female, per vial, over the 13-day assay.

## 268 **Statistical Analysis**

269 General linear mixed models, using a Gaussian distribution, were fitted to the male and female  
270 short-burst offspring production data. Female short-burst fecundity data was modelled by  
271 fitting a generalized linear mixed model, using a Poisson distribution. For data that conformed  
272 to a Poisson distribution, we checked for over-dispersion using the function  
273 “*dispersion\_glm*” in the package *blmeco* (54). Short burst viability data was modelled as a  
274 binomial vector, composed of the number of adults and number of eggs that failed to hatch  
275 (eggs-adults), using a binomial distribution and logit link. For each analysis, mitochondrial  
276 strain was modelled as a fixed effect, and the duplicate nested within mitochondrial strain and  
277 the sampling block (for assays of short-burst components, which were assayed over multiple  
278 blocks) included as random effects, in the *lme4* package (55) in R (56). The fitted models were  
279 evaluated by type III (Wald chisquare tests) sums of squares analysis of variance using the *car*  
280 package in R. We confirmed significance of individual factors using model comparison. The  
281 fitted models were evaluated by simplifying a full model, by sequentially removing terms that  
282 did not change the deviance of the model (at  $\alpha = 0.05$ ); starting with the highest order  
283 interactions, and using log-likelihood ratio tests to assess the change in deviance in the reduced  
284 model relative to the previous model (56).

285

286 For the experiments gauging sustained offspring production, the overall total number of  
287 offspring (for both male and female models) was zero-inflated, and the resulting models over-  
288 dispersed. We therefore analysed both datasets using a negative binomial distribution (57), in  
289 which the zero values are a blend of sampling and structural effects (negative binomial  
290 parameter; variance =  $\phi\mu$ ). These models were performed using the R (v. 3.0.2) package  
291 `glmmADMB` (<http://glmmadmb.r-forge.r-project.org/glmmADMB.html>). The response  
292 variable was total number of offspring produced, with mitochondrial strain and day of  
293 sampling, plus their interaction, as fixed factors. The random effect in the model was  
294 mitochondrial duplicate nested within mitochondrial strain.

295

296 A matrix of mitochondrial genetic correlations (Pearson's correlation coefficients) was created  
297 by obtaining mtDNA haplotype-specific means for each reproductive trait across all  
298 mitochondrial strains. Thus, we had 13 means (one per haplotype) for each female measure of  
299 short burst (including short-burst viability) and sustained offspring production, and 12 means  
300 for the male measures (since the Brownsville haplotype was excluded from the male assays).  
301 Inter-sexual correlations across haplotypes were thus based on 12 means. Correlation  
302 coefficients of all pairwise combinations of traits were then evaluated using a bootstrapping  
303 procedure, in which trait means were resampled with replacement (1000 replicates), and 95%  
304 confidence intervals were calculated using the Adjusted Percentile (BCa) Confidence interval  
305 method. Bootstrapped correlation coefficients plus their confidence intervals were calculated  
306 using the functions "`boot`" and "`boot.ci`" in the R package `boot` (58). Correlations with  
307 confidence intervals that did not overlap with zero were considered statistically significant.

## 308 **Results**

### 309 *Male Mitochondrial Reproductive Success Assays*

310 The identity of the mitochondrial strain affected male short-burst offspring production ( $\chi^2 =$   
311 30.992,  $p = 0.001$ , Table 1A). Male sustained offspring production was affected by an  
312 interaction between mitochondrial strain and day of mating (haplotype  $\times$  day,  $\chi^2 = 183.039$ ,  
313  $p < 0.001$ , Table 1B, Figure 1A, Figure 1A). Male offspring production tended to increase up to  
314 day 4 of adult age, and then incrementally decrease to day 8. However, the magnitude of  
315 increase was contingent on the mtDNA haplotype, with only two haplotypes exhibiting a clear  
316 peak in reproductive success at day 4 (MYS and ORE). The reaction norms per haplotype  
317 crossed-over across the eight days of the experiment, with several haplotypes that exhibited the  
318 highest relative reproductive success at the peak of the assay (day 4) generally associated with  
319 low reproductive success relative to the other haplotypes at Day 1 and 8 of the experiment  
320 (Figure 2A).

321

### 322 *Female Mitochondrial Reproductive Success, and Short-burst Viability Assays*

323 Polymorphisms within the mitochondrial genome affected egg-to-adult viability of a female's  
324 clutch ( $\chi^2 = 67.480$ ,  $p < 0.001$ , Table 1C), short-burst offspring production ( $\chi^2 = 25.18$ ,  $p =$   
325 0.014, Table 1D), but not short-burst fecundity ( $\chi^2 = 7.4573$ ,  $p = 0.826$ , Table 1E). An  
326 interaction between mitochondrial strain and day of the mating assay affected sustained female  
327 reproductive success (haplotype  $\times$  day,  $\chi^2 = 256.3$ ,  $p < 0.001$ , Table 1F, Figure 1B). All  
328 haplotypes exhibited a similar trend, with reproductive success incrementally increasing up  
329 until day 4 of the assay, following which point, reproductive success began to decline. Again,  
330 however, these patterns were contingent on the mtDNA haplotype, with norms of reaction  
331 crossing per haplotype across Days 1, 4 and 8 of the assay (Figure 2B).

332 *Mitochondrial Genetic Correlations*

333 Intra-sexual correlations between reproductive traits tended to be strongly positive in direction  
334 (e.g.  $r_{\text{female short-burst offspring production vs female sustained}} = 0.55$ ;  $r_{\text{male short-burst vs male sustained}} = 0.62$ , Figure  
335 3). Furthermore, short-burst viability exhibited a strong positive correlation with short-burst  
336 offspring production in females, across haplotypes (Figure 3). In contrast, inter-sexual  
337 correlations tended to be negative in direction. In particular, the correlations between female  
338 and male short-burst offspring production, and between female short-burst viability and male  
339 short-burst offspring production, were strongly negative ( $r_{\text{female short-burst offspring viability vs male short-}}$   
340  $\text{burst offspring production}} = -0.43$ , Figure 3), as was the inter-sexual correlation between female short-  
341 burst fecundity and male sustained offspring production ( $r_{\text{female short-burst fecundity vs male sustained}} = -$   
342  $0.44$ , Figure 3).

343

344

345

## 346 **Discussion**

347 We explored mitochondrial genetic effects, across distinct and naturally-occurring  
348 mitochondrial haplotypes, on components of reproductive success in male and female *D.*  
349 *melanogaster*, using an approach that enabled us to unambiguously trace the genetic effects to  
350 the level of the mtDNA sequence. Notably, genetic polymorphisms located across these  
351 haplotypes affected almost all components of reproductive success measured – in females and  
352 in males. Furthermore, we uncovered strong pleiotropy in the reported effects. These patterns  
353 of pleiotropy were positive for intra-sexual correlations across haplotypes (e.g. for associations  
354 between short-burst and sustained components of reproductive success in each of the sexes),  
355 but negative for several of the inter-sexual correlations.

356 Negative inter-sexual correlations are striking because they indicate that, at the level of whole  
357 haplotypes, those haplotypes that confer relatively high reproductive success in one sex,  
358 generally confer low success in the other. Furthermore, we note that our estimate of this  
359 negative correlation is conservative, because it excluded the Brownsville mtDNA haplotype,  
360 which is completely male-sterile in the nuclear background assayed here ( $w^{1118}$ ), and which we  
361 have previously reported to host a sexually antagonistic polymorphism located in the *CytB* gene  
362 (21). The negative correlation between male and female reproductive success is consistent with  
363 evolutionary theory first developed by Frank and Hurst (1996), and which is routinely called  
364 “Mother’s Curse” (29), which proposes that maternal inheritance of the mitochondria will lead  
365 to the accumulation of male-biased mutation loads within the mtDNA sequence (31).  
366 Specifically, however, while Frank and Hurst (1996) envisaged that such mutations would  
367 accumulate under mutation-selection balance (i.e. the mutations would be largely benign, or  
368 slightly deleterious, in their effects on females), our results suggest a role for sexually  
369 antagonistic selection (30, 59), with mutations accumulating in the mtDNA sequence that  
370 augment female reproductive success, but that come at cost to male reproductive performance.



371 Under strict maternal inheritance, female-harming but male-benefiting mtDNA mutations  
372 should be efficiently purged by purifying selection. In contrast, if mtDNA mutations appear  
373 that are female-benefiting, but male-harming, they will presumably increase in frequency under  
374 positive selection (30). Furthermore, the pool of sexually antagonistic mutations accumulating  
375 within the mitochondrial genomes will differ across populations – in terms of the identity of  
376 the mutation sites at which they occur, the associated nucleotides, and total number of  
377 mutations accrued. Consequently, at the level of whole haplotypes sourced from different  
378 global populations, we should then expect to observe a negative genetic correlation, with  
379 haplotypes that harbour numerous female-benefiting but male-harming mutations (or  
380 alternatively harbouring a few mtDNA mutations of major sexually antagonistic effect)  
381 conferring higher relative female, but lower male, reproductive success. Conversely, those  
382 haplotypes harbouring few such mutations (or alternatively mutations of only minor effect)  
383 will confer lower female reproductive success relative to other haplotypes, but relatively higher  
384 success in males.

385 In our study, we included egg-to-adult viability of the female clutch, as a measure in our  
386 analyses; a measure that lies at the interface between a maternal and an offspring trait (48-53).  
387 We found that mitochondrial haplotypic covariance between short-burst viability and female  
388 sustained offspring production was strongly positive, while mitochondrial covariance between  
389 short-burst viability and male short-burst offspring production was strongly negative. These  
390 patterns of covariation are striking, because they indicate that the direction of selection on  
391 mitochondrial mutations might not only be directly antagonistic between adult males and adult  
392 females, but also between juvenile components of fitness and components of adult male fitness,  
393 thus acting to exacerbate the rate at which male-biased mitochondrial mutation loads will  
394 accumulate within populations. That is, these correlations imply that mutations exist within the  
395 mitochondrial genome that not only augment adult female reproductive success, but also the

396 survival chances of females during juvenile development, and that these mutations will thus  
397 presumably be under strong positive selection, even though these same mutations appear to  
398 exert negative effects on male components of reproductive success.

399 Our findings provide strong empirical evidence for the emerging realization that non-neutral  
400 polymorphisms that accumulate within the mitochondrial genome will exert pleiotropic effects  
401 across life-history traits, not just within a sex, but also across the sexes. Here, in this study, we  
402 limited our investigation to correlations across different components of reproductive success  
403 in each of the sexes, and also the short-burst viability of reproducing females. But, previous  
404 studies have reported mitochondrial genetic associations between longevity and reproductive  
405 success, or traits associated with juvenile components of fitness (32, 37, 60). For example,  
406 consistent with the signature of intra-sexual positive pleiotropy identified in our experiment  
407 here, Dowling et al. (2009) reported a positive genetic association between female longevity  
408 and female reproductive success, between two mtDNA haplotypes that were segregating within  
409 a population of *D. melanogaster*. Moreover, consistent with the intersexual negative  
410 correlations found in our current study, Rand et al. (2001) reported a negative correlation  
411 between the sexes for a measure of juvenile viability in *D. melanogaster* (based on a  
412 chromosome segregation assay), across two of three mtDNA haplotypes measured. And  
413 recently, Camus et al (2015) identified sex-specific effects tied to polymorphisms at key  
414 protein-coding mtDNA genes, *mt:ND5* and *mt:Cyt-b*. In particular, a single nonsynonymous  
415 mutation (Ala-278-Thr) in the *mt:Cyt-b* gene was associated with patterns of antagonistic  
416 pleiotropy both within and between the sexes (21). Females with the Brownsville haplotype,  
417 which carries this SNP, were fully fertile but suffered short longevity relative to females with  
418 other haplotypes. Males with this SNP, however, suffer reduced fertility (38), and are in fact  
419 completely sterile when this SNP is placed in the  $w^{1118}$  nuclear background used here, but  
420 experience higher longevity than males with other haplotypes (21). This is the first identified

421 SNP within the mitochondrial genome associated with overtly sexually antagonistic effects.  
422 However, as our results here suggest, there are likely to be numerous other such SNPs  
423 segregating within the mitochondrial genome.

424 Finally, we note that the aforementioned Ala-278-Thr SNP in the *mt:Cyt-b* is an example of a  
425 SNP in the mtDNA that is putatively entwined in the regulation of the classic life-history trade-  
426 off between investment into reproduction versus survival. Our current study reinforces a  
427 growing body of evidence that supports the contention that the genetic variation harboured  
428 within the mitochondrial genome is likely to influence patterns of covariation between  
429 numerous components of life-history in each of the sexes (21, 37, 60). We encourage future  
430 studies of mitochondrial genetic variation to increasingly take a multivariate approach when  
431 screening for mtDNA-mediated effects on each of the sexes, to help elucidate the extent to  
432 which the mitochondrial genome contributes to the evolution of sex differences and life-history  
433 trade-offs (32, 61).

434

## 435 **Acknowledgements**

436 We thank Winston Yee for his help with fly husbandry, and David Clancy for providing  
437 *Drosophila melanogaster* mitochondrial populations in 2007. The study was funded by the  
438 Australian Research Council (grant number DP1092897 and DP170100165 to DKD).

439

440

441

442

## 443   **References**

- 444    1.     Gray MW. The endosymbiont hypothesis revisited. *Int Rev Cytol.* 1992;141:233-357.
- 445    2.     Embley TM, Martin W. Eukaryotic evolution, changes and challenges. *Nature.*  
446    2006;440(7084):623-30.
- 447    3.     Wolff JN, Ladoukakis ED, Enriquez JA, Dowling DK. Mitonuclear interactions:  
448    evolutionary consequences over multiple biological scales. *Philosophical Transactions of the*  
449    *Royal Society of London Series B, Biological Sciences.* 2014;369(1646):20130443.
- 450    4.     Lane N. *Power, sex, suicide : mitochondria and the meaning of life.* Oxford ; New York:  
451    Oxford University Press; 2005. xiii, 354 p. p.
- 452    5.     Rand DM, Haney RA, Fry AJ. Cytonuclear coevolution: the genomics of cooperation.  
453    *Trends Ecol Evol.* 2004;19(12):645-53.
- 454    6.     Ballard JWO, Whitlock MC. The incomplete natural history of mitochondria. *Mol Ecol.*  
455    2004;13(4):729-44.
- 456    7.     Dowling DK, Friberg U, Lindell J. Evolutionary implications of non-neutral  
457    mitochondrial genetic variation. *Trends Ecol Evol.* 2008;23(10):546-54.
- 458    8.     Cooper BS, Burrus CR, Ji C, Hahn MW, Montooth KL. Similar Efficacies of Selection  
459    Shape Mitochondrial and Nuclear Genes in Both *Drosophila melanogaster* and *Homo sapiens*.  
460    *G3-Genes Genom Genet.* 2015;5(10):2165-76.
- 461    9.     Lynch M. Mutation accumulation in nuclear, organelle, and prokaryotic transfer RNA  
462    genes. *Molecular Biology and Evolution.* 1997;14(9):914-25.
- 463    10.    Pesole G, Gissi C, Catalano D, Grillo G, Licciulli F, Liuni S, et al. MitoNuc and  
464    MitoAln: two related databases of nuclear genes coding for mitochondrial proteins. *Nucleic*  
465    *Acids Res.* 2000;28(1):163-5.
- 466    11.    Saccone C, Gissi C, Lanave C, Larizza A, Pesole G, Reyes A. Evolution of the  
467    mitochondrial genetic system: an overview. *Gene.* 2000;261(1):153-9.
- 468    12.    Galtier N, Nabholz B, Glemin S, Hurst GDD. Mitochondrial DNA as a marker of  
469    molecular diversity: a reappraisal. *Mol Ecol.* 2009;18(22):4541-50.
- 470    13.    Ballard JW, Kreitman M. Unraveling selection in the mitochondrial genome of  
471    *Drosophila.* *Genetics.* 1994;138(3):757-72.
- 472    14.    Rand DM. The Units of Selection in Mitochondrial DNA. *Annu Rev Ecol Syst.*  
473    2001;32(1):415-48.
- 474    15.    Maklakov AA, Friberg U, Dowling DK, Arnqvist G. Within-population variation in  
475    cytoplasmic genes affects female life span and aging in *Drosophila melanogaster.* *Evolution.*  
476    2006;60(10):2081-6.
- 477    16.    Melvin RG, Ballard JWO. Intraspecific variation in survival and mitochondrial  
478    oxidative phosphorylation in wild-caught *Drosophila simulans.* *Aging Cell.* 2006;5(3):225-33.
- 479    17.    Dowling DK, Friberg U, Hailer F, Arnqvist G. Intergenomic epistasis for fitness:  
480    Within-population interactions between cytoplasmic and nuclear genes in *Drosophila*  
481    *melanogaster.* *Genetics.* 2007;175(1):235-44.

- 482 18. Jelic M, Arnqvist G, Kurbalija Novicic Z, Kenig B, Tanaskovic M, Andelkovic M, et  
483 al. Sex-specific effects of sympatric mitonuclear variation on fitness in *Drosophila subobscura*.  
484 BMC Evol Biol. 2015;15(1):135.
- 485 19. James AC, Ballard JWO. Mitochondrial genotype affects fitness in *Drosophila*  
486 *simulans*. Genetics. 2003;164(1):187-94.
- 487 20. Zhu CT, Ingelmo P, Rand DM. GxGxE for lifespan in *Drosophila*: mitochondrial,  
488 nuclear, and dietary interactions that modify longevity. PLoS Genet. 2014;10(5):e1004354.
- 489 21. Camus MF, Wolf JBW, Morrow EH, Dowling DK. Single Nucleotides in the mtDNA  
490 Sequence Modify Mitochondrial Molecular Function and Are Associated with Sex-Specific  
491 Effects on Fertility and Aging. Curr Biol. 2015;25(20):2717-22.
- 492 22. Immonen E, Collet M, Goenaga J, Arnqvist G. Direct and indirect genetic effects of  
493 sex-specific mitonuclear epistasis on reproductive ageing. Heredity. 2016;116(3):338-47.
- 494 23. Salminen TS, Oliveira MT, Cannino G, Lillsunde P, Jacobs HT, Kaguni LS.  
495 Mitochondrial genotype modulates mtDNA copy number and organismal phenotype in  
496 *Drosophila*. Mitochondrion. 2017.
- 497 24. Mishmar D, Ruiz-Pesini E, Golik P, Macaulay V, Clark AG, Hosseini S, et al. Natural  
498 selection shaped regional mtDNA variation in humans. Proceedings of the National Academy  
499 of Sciences. 2003;100(1):171-6.
- 500 25. Ruiz-Pesini E, Mishmar D, Brandon M, Procaccio V, Wallace DC. Effects of Purifying  
501 and Adaptive Selection on Regional Variation in Human mtDNA. Science.  
502 2004;303(5655):223-6.
- 503 26. Meiklejohn CD, Montooth KL, Rand DM. Positive and negative selection on the  
504 mitochondrial genome. Trends Genet. 2007;23(6):259-63.
- 505 27. Lynch M, Koskella B, Schaack S. Mutation pressure and the evolution of organelle  
506 genomic architecture. Science. 2006;311(5768):1727-30.
- 507 28. Frank SA, Hurst LD. Mitochondria and male disease. Nature. 1996;383(6597):224.
- 508 29. Gemmell NJ, Metcalf VJ, Allendorf FW. Mother's curse: the effect of mtDNA on  
509 individual fitness and population viability. Trends Ecol Evol. 2004;19(5):238-44.
- 510 30. Beekman M, Dowling DK, Aanen DK. The costs of being male: are there sex-specific  
511 effects of uniparental mitochondrial inheritance? Philos T R Soc B. 2014;369(1646).
- 512 31. Innocenti P, Morrow EH, Dowling DK. Experimental evidence supports a sex-specific  
513 selective sieve in mitochondrial genome evolution. Science. 2011;332(6031):845-8.
- 514 32. Camus MF, Clancy DJ, Dowling DK. Mitochondria, maternal inheritance and male  
515 ageing. Curr Biol. 2012;22(18):1717-21.
- 516 33. Mossman JA, Tross JG, Li N, Wu Z, Rand DM. Mitochondrial-Nuclear Interactions  
517 Mediate Sex-Specific Transcriptional Profiles in *Drosophila*. Genetics. 2016;204(2):613-30.
- 518 34. Mossman JA, Tross JG, Jourjine NA, Li N, Wu Z, Rand DM. Mitonuclear Interactions  
519 Mediate Transcriptional Responses to Hypoxia in *Drosophila*. Mol Biol Evol. 2017;34(2):447-  
520 66.
- 521 35. Mossman JA, Biancani LM, Zhu CT, Rand DM. Mitonuclear Epistasis for  
522 Development Time and Its Modification by Diet in *Drosophila*. Genetics. 2016;203(1):463-84.

- 523 36. Frank SA. Evolution: mitochondrial burden on male health. *Curr Biol.*  
524 2012;22(18):R797-9.
- 525 37. Dowling DK, Maklakov AA, Friberg U, Hailer F. Applying the genetic theories of  
526 ageing to the cytoplasm: cytoplasmic genetic covariation for fitness and lifespan. *J Evol Biol.*  
527 2009;22(4):818-27.
- 528 38. Clancy DJ, Hime GR, Shirras AD. Cytoplasmic male sterility in *Drosophila*  
529 *melanogaster* associated with a mitochondrial CYTB variant. *Heredity.* 2011;107(4):374-6.
- 530 39. Dean R, Zimmer F, Mank JE. The Potential Role of Sexual Conflict and Sexual  
531 Selection in Shaping the Genomic Distribution of Mito-nuclear Genes. *Genome Biol Evol.*  
532 2014;6(5):1096-104.
- 533 40. Rogell B, Dean R, Lemos B, Dowling DK. Mito-nuclear interactions as drivers of gene  
534 movement on and off the X-chromosome. *BMC Genomics.* 2014;15.
- 535 41. Drown DM, Preuss KM, Wade MJ. Evidence of a Paucity of Genes That Interact with  
536 the Mitochondrion on the X in Mammals. *Genome Biol Evol.* 2012;4(8):875-80.
- 537 42. Clancy DJ. Variation in mitochondrial genotype has substantial lifespan effects which  
538 may be modulated by nuclear background. *Aging Cell.* 2008;7(6):795-804.
- 539 43. Wolff JN, Camus MF, Clancy DJ, Dowling DK. Complete mitochondrial genome  
540 sequences of thirteen globally sourced strains of fruit fly (*Drosophila melanogaster*) form a  
541 powerful model for mitochondrial research. *Mitochondrial DNA A.* 2016;27(6):4672-4.
- 542 44. Clancy DJ, Hoffmann AA. Environmental effects on cytoplasmic incompatibility and  
543 bacterial load in Wolbachia-infected *Drosophila simulans*. *Entomol Exp Appl.* 1998;86(1):13-  
544 24.
- 545 45. O'Neill SL, Giordano R, Colbert AME, Karr TL, Robertson HM. 16s ribosomal-RNA  
546 phylogenetic analysis of the bacterial endosymbionts associated with cytoplasmic  
547 incompatibility in insects. *Proc Natl Acad Sci U S A.* 1992;89(7):2699-702.
- 548 46. Yee WKW, Rogell B, Lemos B, Dowling DK. Intergenomic interactions between  
549 mitochondrial and Y-linked genes shape male mating patterns and fertility in *Drosophila*  
550 *melanogaster*. *Evolution.* 2015:n/a-n/a.
- 551 47. Fox CW. Maternal and genetic influences on egg size and larval performance in a seed  
552 beetle (*Callosobruchus maculatus*): multigenerational transmission of a maternal effect?  
553 *Heredity.* 1994;73(5):509-17.
- 554 48. Hercus MJ, Hoffmann AA. Maternal and grandmaternal age influence offspring fitness  
555 in *Drosophila*. *Proc R Soc Biol Sci Ser B.* 2000;267(1457):2105-10.
- 556 49. Kern S, Ackermann M, Stearns SC, Kawecki TJ. Decline in offspring viability as a  
557 manifestation of aging in *Drosophila melanogaster*. *Evolution.* 2001;55(9):1822-31.
- 558 50. Vijendravarma RK, Kawecki TJ. Idiosyncratic evolution of maternal effects in response  
559 to juvenile malnutrition in *Drosophila*. *J Evol Biol.* 2015;28(4):876-84.
- 560 51. Stearns SC. *The Evolution of Life Histories*: OUP Oxford; 1992.
- 561 52. Berrigan D. The Allometry of Egg Size and Number in Insects. *Oikos.* 1991;60(3):313-  
562 21.
- 563 53. Montague JR, Mangan RL, Starmer WT. Reproductive Allocation in the Hawaiian  
564 *Drosophilidae* - Egg Size and Number. *Am Nat.* 1981;118(6):865-71.



- 565 54. Korner-Nievergelt F, Roth T, Felten; Sv, Guelat J, Almasi B, Korner-Nievergelt P.  
566 Bayesian Data Analysis in Ecology using Linear Models with  
567 R, BUGS and Stan: Elsevier; 2005.
- 568 55. Bates D, Maechler, M., Bolkler, B. *lme4*: Linear mixed-effects models using S4 classes.  
569 R package version 0999999-0 <http://cranr-project.org/package=lme4>. 2012.
- 570 56. Fox J. An R and S-Plus companion to applied regression. Thousand Oaks, Calif.: Sage  
571 Publications; 2002. xvi, 312 p. p.
- 572 57. Mullahy J. Specification and Testing of Some Modified Count Data Models. *Journal of*  
573 *Econometrics*. 1986;33(3):341-65.
- 574 58. Davison AC, Hinkley DV. *Bootstrap Methods and Their Applications*: Cambridge  
575 University Press; 1997.
- 576 59. Unckless RL, Herren JK. Population genetics of sexually antagonistic mitochondrial  
577 mutants under inbreeding. *J Theor Biol*. 2009;260(1):132-6.
- 578 60. Rand DM, Clark AG, Kann LM. Sexually antagonistic cytonuclear fitness interactions  
579 in *Drosophila melanogaster*. *Genetics*. 2001;159(1):173-87.
- 580 61. Maklakov AA, Lummaa V. Evolution of sex differences in lifespan and aging: causes  
581 and constraints. *BioEssays*. 2013;35(8):717-24.

582

583

584

585

586

## 587 **Tables and Figures**

588 **Table 1:** Mitochondrial effects on male (A) short-burst offspring production and (B) sustained  
589 offspring production, and female (C) short-burst viability, (D) short-burst offspring production,  
590 (E) short-burst fecundity, and (F) sustained offspring production. Haplotype denotes the effect  
591 of mitochondrial strain (hence mtDNA haplotype), and Duplicate[Haplotype] denotes the  
592 mitochondrial strain duplicate. In the short-burst assays, each experiment was conducted over  
593 consecutive sampling blocks (Block). In the sustained offspring production assays, each  
594 experiment was conducted over a number of consecutive days (Day; 8 in males, 13 in females).  
595 For all models, chi-square test statistics ( $\chi^2$ ), degrees of freedom, and p values are reported for  
596 fixed effects, and standard deviation (SD) for random effects.

| <b>A) Male short-burst offspring production</b> |          |      |          |
|-------------------------------------------------|----------|------|----------|
|                                                 | $\chi^2$ | d.f. | P        |
| (Intercept)                                     | 611.758  | 1    | < 0.001  |
| Haplotype                                       | 30.992   | 11   | 0.001104 |
| <b>SD</b>                                       |          |      |          |
| Duplicate [Haplotype]                           | 2.969    |      |          |
| Block                                           | 0.000    |      |          |
| Residual                                        | 21.546   |      |          |
| <b>B) Male sustained offspring production</b>   |          |      |          |
|                                                 | $\chi^2$ | d.f. | P        |
| Haplotype                                       | 25.299   | 12   | 0.04738  |
| Day                                             | 14.221   | 12   | 0.00824  |
| Haplotype × Day                                 | 183.039  | 144  | <0.001   |
| <b>SD</b>                                       |          |      |          |
| Duplicate [Haplotype]                           | 0.00813  |      |          |
| <b>C) Female short-burst viability</b>          |          |      |          |
|                                                 | $\chi^2$ | d.f. | P        |
| (Intercept)                                     | 0.304    | 1    | 0.5814   |
| Haplotype                                       | 67.480   | 12   | < 0.001  |
| <b>SD</b>                                       |          |      |          |



|                       |         |
|-----------------------|---------|
| Duplicate [Haplotype] | 0.07203 |
| Block                 | 0.34723 |

---

**D) Female short-burst offspring production**

---

|             | $\chi^2$ | d.f. | P      |
|-------------|----------|------|--------|
| (Intercept) | 126.62   | 1    | <0.001 |
| Haplotype   | 25.18    | 12   | 0.014  |

**SD**

|                       |        |
|-----------------------|--------|
| Duplicate [Haplotype] | 0.0084 |
| Block                 | 1.932  |
| Residual              | 8.306  |

---

**E) Female short-burst fecundity**

---

|             | $\chi^2$ | d.f. | P      |
|-------------|----------|------|--------|
| (Intercept) | 66.6413  | 1    | <0.001 |
| Haplotype   | 7.4573   | 12   | 0.826  |

**SD**

|                       |        |
|-----------------------|--------|
| Duplicate [Haplotype] | 1.838  |
| Block                 | 6.039  |
| Residual              | 14.506 |

---

**F) Female sustained offspring production**

---

|                 | $\chi^2$ | d.f. | P      |
|-----------------|----------|------|--------|
| Haplotype       | 9.6678   | 12   | 0.6451 |
| Day             | 189.9237 | 12   | <0.001 |
| Haplotype × Day | 256.3273 | 144  | <0.001 |

**SD**

|                       |        |
|-----------------------|--------|
| Duplicate [Haplotype] | 0.1009 |
|-----------------------|--------|

---



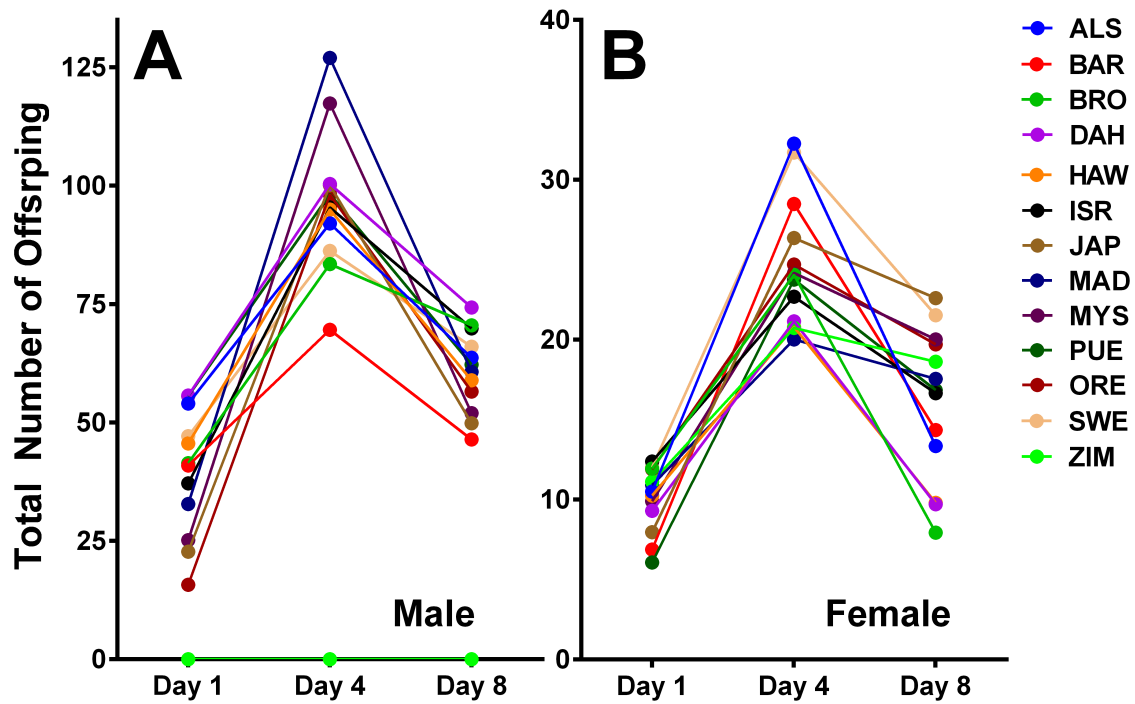

**Figure 2:** Mean number of offspring produced (reproductive success) for (A) males and (B) females across the mitochondrial strains, at 3 different age points of the sustained offspring

605 production experiment.

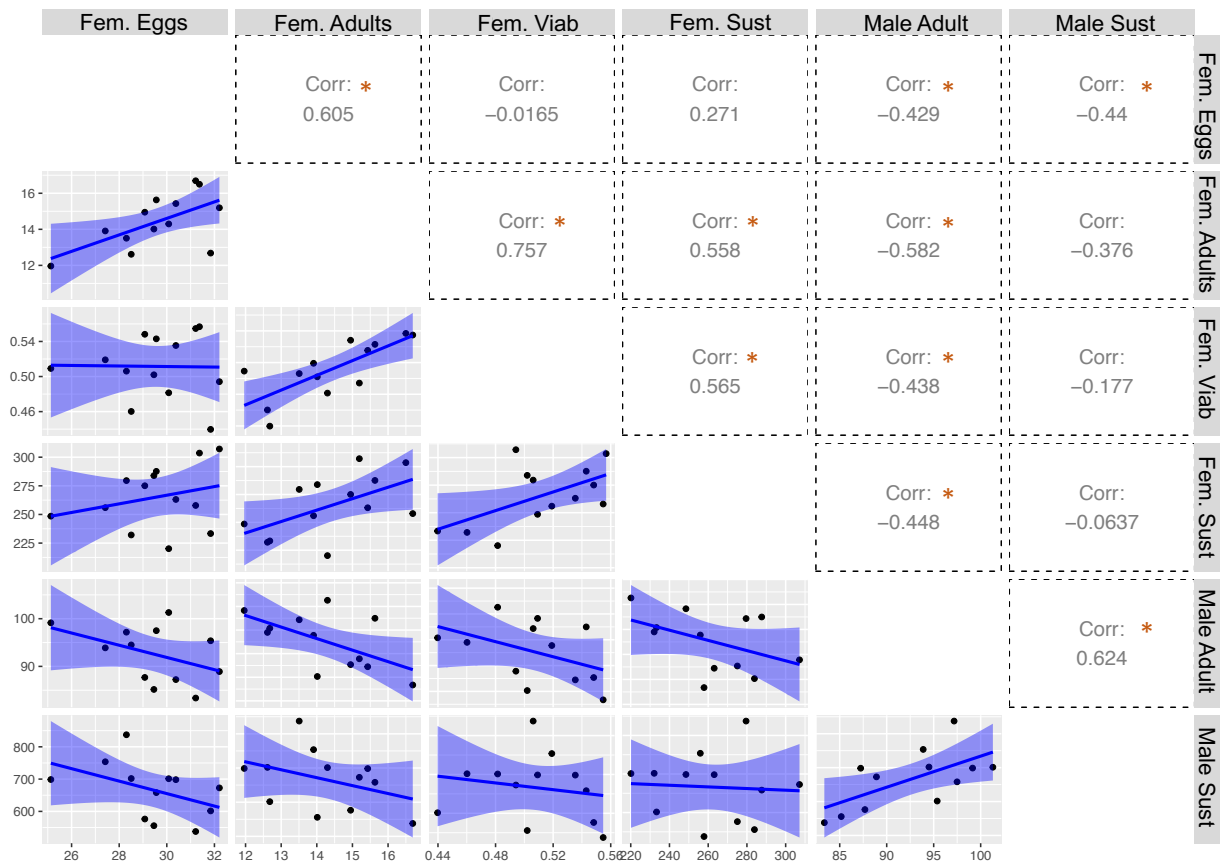

**Figure 3:** Correlation estimates of intra- and inter-sexual genetic correlations for male and female reproductive traits across mitochondrial haplotypes. Significance is noted as a star next to the coefficient, and represent bootstrapped confidence intervals (95%) that do not overlap with zero.
